# Supplementary material
Source: publisher site journal article supplement (http://e-cmh.org/upload/media/cmh-2022-0040-suppl4.pdf)
Supplement: Supplementary file 1 [file cmh-2022-0040-suppl4.pdf]

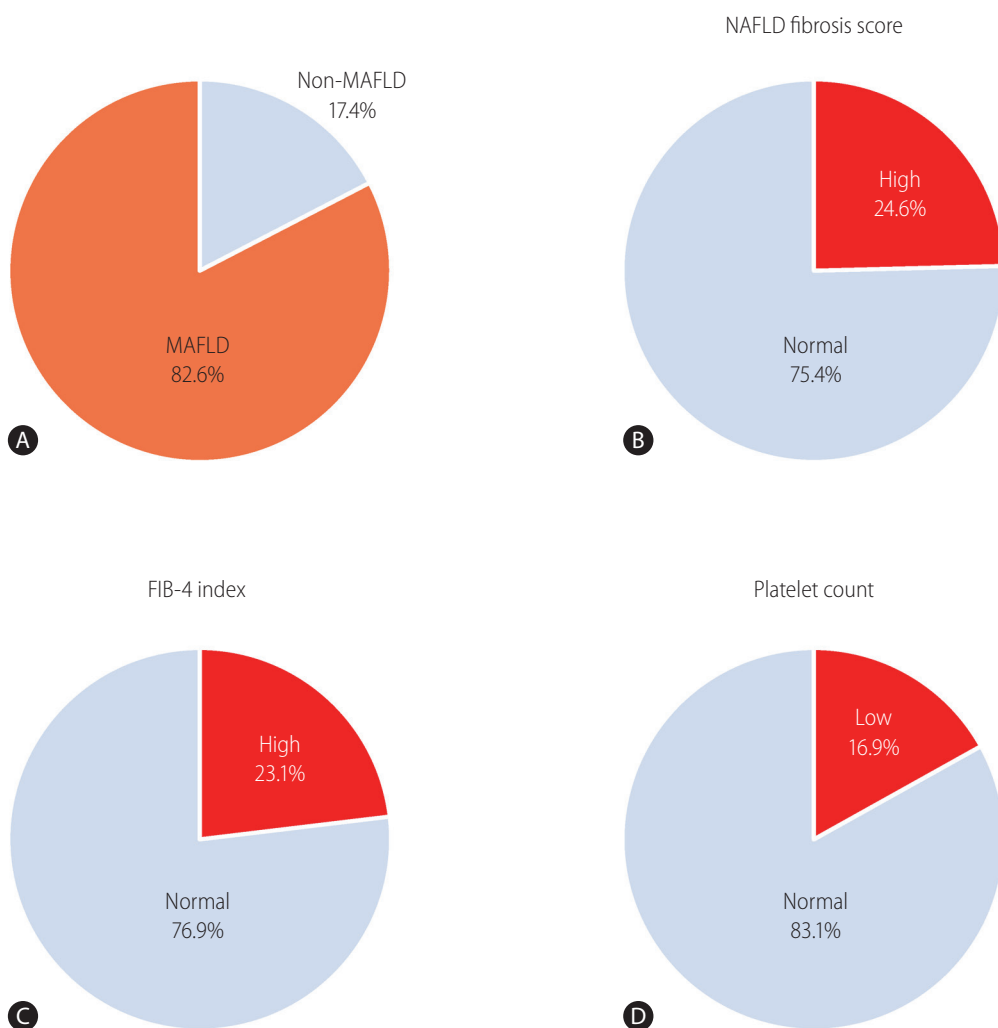

**Supplementary Figure 1.** The prevalence of MAFLD and high hepatic fibrosis indexes. (A) MAFLD, (B) NAFLD fibrosis score, (C) FIB-4 index, and (D) platelet count. Normal or high NAFLD fibrosis score was classified based on the cut-off value of -1.455. Normal or high FIB-4 index was classified based on the cut-off value of 1.3. Normal or low platelet count was classified based on the cut-off value of  $20.0 \times 10^4 / \mu\text{L}$ . NAFLD, non-alcoholic fatty liver disease; MAFLD, metabolic dysfunction-associated fatty liver disease; FIB-4, fibrosis-4.
